# Supplementary material for: Yeast Bloodstream Infections in the COVID-19 Patient: A Multicenter Italian Study (FiCoV Study)
Source: MDPI journal article supplement (doi:10.3390/jof9020277), 2023-02-20
Supplement: s1 [file s1]

| Species<br>(n. isolates tested) | Antifungal agent<br>(n. isolates<br>tested) | No. of isolates with MIC (mg/L) of: |       |      |      |       |      |     |    |    |   |   |    |    |    |     |     |
|---------------------------------|---------------------------------------------|-------------------------------------|-------|------|------|-------|------|-----|----|----|---|---|----|----|----|-----|-----|
|                                 |                                             | 0.008                               | 0.015 | 0.03 | 0.06 | 0.125 | 0.25 | 0.5 | 1  | 2  | 4 | 8 | 16 | 32 | 64 | 128 | 256 |
| <i>C. albicans</i> (106)        | Anidulafungin (86)                          | -                                   | 28    | 13   | 21   | 21    |      |     | 2  | 1  |   |   | -  | -  | -  | -   | -   |
|                                 | Caspofungin (104)                           | 5                                   | 9     | 25   | 32   | 29    | 2    | 2   |    |    |   |   | -  | -  | -  | -   | -   |
|                                 | Micafungin (85)                             | 32                                  | 47    | 2    | 1    |       |      |     | 3  |    |   |   | -  | -  | -  | -   | -   |
|                                 | Itraconazole (84)                           | -                                   | 6     | 20   | 32   | 23    | 1    |     | 1  |    |   |   | 1  | -  | -  | -   | -   |
|                                 | Fluconazole (104)                           | -                                   | -     | -    | -    | 7     | 32   | 52  | 7  | 2  |   | 1 | 2  |    |    | 1   |     |
|                                 | Voriconazole (104)                          | 53                                  | 18    | 8    | 2    | 19    | 2    | 1   |    |    |   | 1 | -  | -  | -  | -   | -   |
|                                 | Posaconazole (74)                           | 5                                   | 22    | 33   | 11   | 1     |      | 1   |    |    |   | 1 | -  | -  | -  | -   | -   |
|                                 | 5-Fluorocytosine (72)                       | -                                   | -     | -    | 46   | 22    | 2    | 1   | 1  |    |   |   |    |    |    | -   | -   |
|                                 | Amphotericin B (95)                         | -                                   | -     | -    | -    | 3     | 7    | 60  | 25 |    |   |   | -  | -  | -  | -   | -   |
|                                 | Anidulafungin (127)                         |                                     | 1     |      |      | 1     | 1    | 6   | 92 | 26 |   | - | -  | -  | -  | -   |     |
|                                 | Caspofungin (145)                           |                                     |       | 1    |      | 3     | 14   | 64  | 61 | 2  |   |   | -  | -  | -  | -   | -   |
|                                 | Micafungin (146)                            | 1                                   |       | 1    |      | 1     | 2    | 27  | 90 | 24 |   |   | -  | -  | -  | -   | -   |
| <i>C. parapsilosis</i> (146)    | Itraconazole (125)                          | -                                   | 7     | 7    | 14   | 51    | 46   |     |    |    |   |   |    | -  | -  | -   | -   |
|                                 | Fluconazole (146)                           | -                                   | -     | -    | -    | 3     | 6    | 16  | 13 | 1  |   | 8 | 6  | 12 | 42 | 37  | 2   |
|                                 | Voriconazole (145)                          | 5                                   | 8     | 8    | 2    | 6     | 10   | 50  | 31 | 15 |   |   | -  | -  | -  | -   | -   |
|                                 | Posaconazole (120)                          | 4                                   | 10    | 24   | 51   | 29    | 2    |     |    |    |   |   | -  | -  | -  | -   | -   |
|                                 | 5-Fluorocytosine (69)                       | -                                   | -     | -    | 28   | 32    | 7    | 1   | 1  |    |   |   |    |    |    | -   | -   |
|                                 | Amphotericin B (140)                        | -                                   | -     | -    | -    | 5     | 17   | 94  | 24 |    |   |   | -  | -  | -  | -   | -   |

|                                |                       | 0.008 | 0.015 | 0.03 | 0.06 | 0.125 | 0.25 | 0.5 | 1  | 2  | 4 | 8 | 16 | 32 | 64 | 128 | 256 |
|--------------------------------|-----------------------|-------|-------|------|------|-------|------|-----|----|----|---|---|----|----|----|-----|-----|
| <i>C. glabrata</i> (31)        | Anidulafungin (28)    |       | 9     | 12   | 6    | 1     |      |     |    |    |   | - | -  | -  | -  | -   |     |
|                                | Caspofungin (28)      |       | 1     | 4    | 12   | 7     | 4    |     |    |    |   |   | -  | -  | -  | -   | -   |
|                                | Micafungin (31)       |       | 26    | 5    |      |       |      |     |    |    |   |   | -  | -  | -  | -   | -   |
|                                | Itraconazole (28)     | -     |       |      |      | 3     | 1    | 12  | 11 |    |   | 1 |    | -  | -  | -   | -   |
|                                | Fluconazole (28)      | -     | -     | -    | -    |       |      | 1   |    | 3  | 7 | 3 | 7  | 4  | 1  | 2   |     |
|                                | Voriconazole (27)     |       |       |      |      | 4     | 8    | 6   | 9  |    |   |   | -  | -  | -  | -   | -   |
|                                | Posaconazole (26)     |       |       |      |      |       | 3    | 2   | 9  | 11 | 1 |   | -  | -  | -  | -   | -   |
|                                | 5-Fluorocytosine (22) | -     | -     | -    | 16   |       |      |     |    | 2  | 1 | 3 |    |    |    | -   | -   |
|                                | Amphotericin B (28)   | -     | -     | -    | -    | 1     | 4    | 7   | 16 |    |   |   | -  | -  | -  | -   | -   |
| <i>C. tropicalis</i> (9)       | Anidulafungin (8)     |       | 1     |      | 1    | 5     | 1    |     |    |    |   | - | -  | -  | -  | -   |     |
|                                | Caspofungin (9)       |       |       | 1    | 4    | 3     | 1    |     |    |    |   |   | -  | -  | -  | -   | -   |
|                                | Micafungin (9)        |       | 1     | 6    | 2    |       |      |     |    |    |   |   | -  | -  | -  | -   | -   |
|                                | Itraconazole (9)      | -     |       | 1    |      | 1     | 5    |     | 1  |    |   |   | 1  | -  | -  | -   | -   |
|                                | Fluconazole (9)       | -     | -     | -    | -    |       |      | 2   | 1  | 4  | 1 |   |    |    |    | 1   |     |
|                                | Voriconazole (9)      |       | 1     |      | 1    | 2     | 4    |     | 1  |    |   |   | -  | -  | -  | -   | -   |
|                                | Posaconazole (7)      |       |       | 1    |      | 2     | 4    |     |    |    |   |   | -  | -  | -  | -   | -   |
|                                | 5-Fluorocytosine (6)  | -     | -     | -    | 1    |       |      | 1   | 1  | 1  |   |   |    |    | 2  | -   | -   |
|                                | Amphotericin B (8)    | -     | -     | -    | -    | 1     | 3    | 4   |    |    |   |   | -  | -  | -  | -   | -   |
| Other <i>Candida</i> spp.* (4) | Anidulafungin (3)     |       |       |      |      |       | 3    |     |    |    |   | - | -  | -  | -  | -   |     |
|                                | Caspofungin (4)       |       |       |      |      |       | 2    | 2   |    |    |   |   | -  | -  | -  | -   | -   |
|                                | Micafungin (4)        |       |       |      | 2    | 1     |      | 1   |    |    |   |   | -  | -  | -  | -   | -   |

|                          |                      | 0.008 | 0.015 | 0.03 | 0.06 | 0.125 | 0.25 | 0.5 | 1 | 2 | 4 | 8 | 16 | 32 | 64 | 128 | 256 |
|--------------------------|----------------------|-------|-------|------|------|-------|------|-----|---|---|---|---|----|----|----|-----|-----|
| <i>Saccharomyces</i> (3) | Itraconazole (3)     | -     |       |      | 2    | 1     |      |     |   |   |   |   |    | -  | -  | -   | -   |
|                          | Fluconazole (4)      | -     | -     | -    | -    |       | 1    | 1   | 1 | 1 |   |   |    |    |    |     |     |
|                          | Voriconazole (4)     | 2     | 1     |      |      | 1     |      |     |   |   |   |   | -  | -  | -  | -   | -   |
|                          | Posaconazole (3)     |       | 1     | 1    | 1    |       |      |     |   |   |   |   | -  | -  | -  | -   | -   |
|                          | 5-Fluorocytosine (3) | -     | -     | -    | 1    |       |      | 1   |   | 1 |   |   |    |    |    | -   | -   |
|                          | Amphotericin B (4)   | -     | -     | -    | -    |       | 2    | 1   | 1 |   |   |   | -  | -  | -  | -   | -   |
|                          | Anidulafungin (3)    |       | 1     |      | 1    |       |      |     |   |   |   | - | -  | -  | -  | -   |     |
|                          | Caspofungin (3)      |       |       | 1    | 2    |       |      |     |   |   |   |   | -  | -  | -  | -   | -   |
|                          | Micafungin (3)       |       |       |      | 1    | 2     |      |     |   |   |   |   | -  | -  | -  | -   | -   |
|                          | Itraconazole (3)     | -     |       |      |      |       |      |     | 2 |   |   |   | 1  | -  | -  | -   | -   |
|                          | Fluconazole (3)      | -     | -     | -    | -    | 2     | 1    |     |   |   |   |   |    |    |    |     |     |
|                          | Voriconazole (3)     |       |       |      |      |       | 1    | 2   |   |   |   |   | -  | -  | -  | -   | -   |
|                          | Posaconazole (3)     |       |       |      |      |       |      |     | 1 | 2 |   |   | -  | -  | -  | -   | -   |
|                          | 5-Fluorocytosine (3) | -     | -     | -    | 2    |       |      |     |   |   |   |   | 1  |    |    | -   | -   |
|                          | Amphotericin B (3)   | -     | -     | -    | -    | 2     | 1    |     |   |   |   |   | -  | -  | -  | -   | -   |

Table S1. In vitro susceptibilities of 299 bloodstream isolates.

- Concentrations not investigated

\* Other *Candida* species include *C. lusitaniae* (2) and *C. metapsilosis* (2).
